# Supplementary material for: DSCAM-AS1 Long Non-Coding RNA Exerts Oncogenic Functions in Endometrial Adenocarcinoma via Activation of a Tumor-Promoting Transcriptome Profile
Source: MDPI journal article supplement (doi:10.3390/biomedicines10071727), 2022-07-18
Supplement: s1 [file s1]

**Supplemental Table S1.** Sequences of primers used for RT-qPCR

| Gene             | Primer (5'-3')                                      | Amplicon [bp] |
|------------------|-----------------------------------------------------|---------------|
| <b>DSCAM-AS1</b> | CTGCAGGGCTGACGTGG<br>GTCTGGTTGGCTTTCCCGAT           | 114           |
| <b>ESR1</b>      | CACATGAGTAACAAAGGCATGG<br>ATGAAGTAGAGCCCGCAGTG      | 181           |
| <b>SCEL</b>      | CGAGCAGAAGAAGTGAAGACCT<br>ATTATCAAGGCTCTGGCCCC      | 149           |
| <b>PLAU</b>      | CCAGGGTCCACCTGTCCC<br>CATTGCTGCCTTTGGAGTCG          | 153           |
| <b>WNT7A</b>     | TCGGGACTATGAACCGGAAA<br>TGAGGAGAAGCCACCGATCC        | 92            |
| <b>TNFSF10</b>   | TCCTCAGAGAGTAGCAGCTCA<br>TTGGAGTTTGGAGAAGACAATGTG   | 72            |
| <b>ACTB</b>      | CTTCCTTCCTGGGCATGGAGT<br>CAGGAGGAGCAATGATCTTGATCTTC | 210           |
