# Supplementary material for: DSCAM-AS1 Long Non-Coding RNA Exerts Oncogenic Functions in Endometrial Adenocarcinoma via Activation of a Tumor-Promoting Transcriptome Profile
Source: MDPI journal article supplement (doi:10.3390/biomedicines10071727), 2022-07-18
Supplement: s1 [file s1]

**Table S2:** Gene Set Enrichment Analysis (GSEA) using MSigDB V7.5.1 of genes up- or down-regulated upon DSCAM-AS1 knockdown in HEC-1A cells by calculation of gene set overlaps. (<http://www.gsea-msigdb.org/gsea/index.jsp>) (FDR = false detection rate)

| Genes down-regulated upon DSCAM-AS1 knockdown: overlapping gene sets |                                                                                                                                                                                                              |                    |                       |                      |
|----------------------------------------------------------------------|--------------------------------------------------------------------------------------------------------------------------------------------------------------------------------------------------------------|--------------------|-----------------------|----------------------|
| Gene Set Name [# Genes (K)]                                          | Description                                                                                                                                                                                                  | # Genes in Overlap | P-value               | FDR                  |
| KOINUMA_TARGETS_OF_SMAD2_OR_SMAD3 [845]                              | Genes with promoters occupied by SMAD2 or SMAD3 [GeneID=4087, 4088] in HaCaT cells (keratinocyte) according to a ChIP-chip analysis.                                                                         | 20                 | 4.38 e <sup>-13</sup> | 1.41 e <sup>-8</sup> |
| ANDERSEN_CHOLANGIOCARCINOMA_CLASS2 [175]                             | Genes overexpressed in cholangiocarcinoma class 2 associated with poor prognosis.                                                                                                                            | 11                 | 3.87 e <sup>-12</sup> | 6.22 e <sup>-8</sup> |
| ONDER_CDH1_TARGETS_2_DN [473]                                        | Genes down-regulated in HMLE cells (immortalized nontransformed mammary epithelium) after E-cadherin (CDH1) [GeneID=999] knockdown by RNAi.                                                                  | 14                 | 1.02 e <sup>-10</sup> | 1.09 e <sup>-6</sup> |
| CHARAFE_BREAST_CANCER_LUMINAL_VS_BASAL_SAL_DN [456]                  | Genes down-regulated in luminal-like breast cancer cell lines compared to the basal-like ones.                                                                                                               | 12                 | 8.78 e <sup>-9</sup>  | 4.07 e <sup>-5</sup> |
| GOBP_LOCOMOTION [1921]                                               | Self-propelled movement of a cell or organism from one location to another.                                                                                                                                  | 22                 | 2.61 e <sup>-8</sup>  | 9.81 e <sup>-5</sup> |
| ENK_UV_RESPONSE_EPIDERMIS_DN [513]                                   | Genes down-regulated in epidermis after to UVB irradiation.                                                                                                                                                  | 12                 | 3.2 e <sup>-8</sup>   | 1.03 e <sup>-4</sup> |
| FORTSCHEGGER_PHF8_TARGETS_DN [783]                                   | Genes down-regulated in HeLa cells (cervical carcinoma) upon knockdown of PHF8 [GeneID=23133] by RNAi.                                                                                                       | 14                 | 6.12 e <sup>-8</sup>  | 1.79 e <sup>-4</sup> |
| KIM_WT1_TARGETS_12HR_DN [217]                                        | Genes down-regulated in UB27 cells (osteosarcoma) at 12 hr after inducing the expression of a mutated form of WT1 [GeneID=7490].                                                                             | 8                  | 2.34 e <sup>-7</sup>  | 4.43 e <sup>-4</sup> |
| PASINI_SUZ12_TARGETS_DN [316]                                        | Genes down-regulated in ES (embryonic stem cells) with deficient SUZ12 [GeneID=23512].                                                                                                                       | 9                  | 3.56 e <sup>-7</sup>  | 6.37 e <sup>-4</sup> |
| GOBP_CELL_MIGRATION [1556]                                           | The controlled self-propelled movement of a cell from one site to a destination guided by molecular cues. Cell migration is a central process in the development and maintenance of multicellular organisms. | 18                 | 4.9 e <sup>-7</sup>   | 7.89 e <sup>-4</sup> |

| Genes up-regulated upon DSCAM-AS1 knockdown: overlapping gene sets |                                                                                                                                                                        |                    |                       |                       |
|--------------------------------------------------------------------|------------------------------------------------------------------------------------------------------------------------------------------------------------------------|--------------------|-----------------------|-----------------------|
| Gene Set Name [# Genes (K)]                                        | Description                                                                                                                                                            | # Genes in Overlap | P-value               | FDR                   |
| DOUGLAS_BMI1_TARGETS_UP [563]                                      | Genes up-regulated in A4573 cells (Ewing's sarcoma, ESFT) after knockdown of BMI1 [GeneID=648] by RNAi.                                                                | 33                 | 7.07 e <sup>-26</sup> | 7.27 e <sup>-22</sup> |
| MEISSNER_BRAIN_HCP_WITH_H3K4ME3_AND_H3_H3K27ME3 [1073]             | Genes with high-CpG-density promoters (HCP) bearing histone H3 dimethylation at K4 (H3K4me2) and trimethylation at K27 (H3K27me3) in brain.                            | 27                 | 2.87 e <sup>-12</sup> | 1.47 e <sup>-8</sup>  |
| MIR217_5P [187]                                                    | Genes predicted to be targets of miRBase v22 microRNA hsa-miR-217-5p in miRDB v6.0 with MirTarget v4 prediction scores > 80 (high confidence targets).                 | 13                 | 8.99 e <sup>-12</sup> | 3.08 e <sup>-8</sup>  |
| MIR8485 [1034]                                                     | Genes predicted to be targets of miRBase v22 microRNA hsa-miR-8485 in miRDB v6.0 with MirTarget v4 prediction scores > 80 (high confidence targets).                   | 24                 | 2.61 e <sup>-10</sup> | 6.71 e <sup>-7</sup>  |
| WONG_ADULT_TISSUE_STEM_MODULE [721]                                | The 'adult tissue stem' module: genes coordinately up-regulated in a compendium of adult tissue stem cells.                                                            | 20                 | 4.34 e <sup>-10</sup> | 8.92 e <sup>-7</sup>  |
| ESC_V6.5_UP_LATE.V1_UP [182]                                       | Genes up-regulated during late stages of differentiation of embryoid bodies from V6.5 embryonic stem cells.                                                            | 11                 | 1.64 e <sup>-9</sup>  | 2.81 e <sup>-6</sup>  |
| MIR6807_3P [142]                                                   | Genes predicted to be targets of miRBase v22 microRNA hsa-miR-6807-3p in miRDB v6.0 with MirTarget v4 prediction scores > 80 (high confidence targets).                | 10                 | 2.1 e <sup>-9</sup>   | 2.81 e <sup>-6</sup>  |
| LEF1_UP.V1_DN [187]                                                | Genes down-regulated in DLD1 cells (colon carcinoma) over-expressing LEF1 [Gene ID=51176].                                                                             | 11                 | 2.19 e <sup>-9</sup>  | 2.81 e <sup>-6</sup>  |
| MIR548AV_5P_MIR548K [307]                                          | Genes predicted to be targets of miRBase v22 microRNA hsa-miR-548av-5p, hsa-miR-548k in miRDB v6.0 with MirTarget v4 prediction scores > 80 (high confidence targets). | 13                 | 4.05 e <sup>-9</sup>  | 4.16 e <sup>-6</sup>  |
| MIR8054 [307]                                                      | Genes predicted to be targets of miRBase v22 microRNA hsa-miR-8054 in miRDB v6.0 with MirTarget v4 prediction scores > 80 (high confidence targets).                   | 13                 | 4.05 e <sup>-9</sup>  | 4.16 e <sup>-6</sup>  |
