# Supplementary material for: DSCAM-AS1 Long Non-Coding RNA Exerts Oncogenic Functions in Endometrial Adenocarcinoma via Activation of a Tumor-Promoting Transcriptome Profile
Source: MDPI journal article supplement (doi:10.3390/biomedicines10071727), 2022-07-18
Supplement: s1 [file s1]

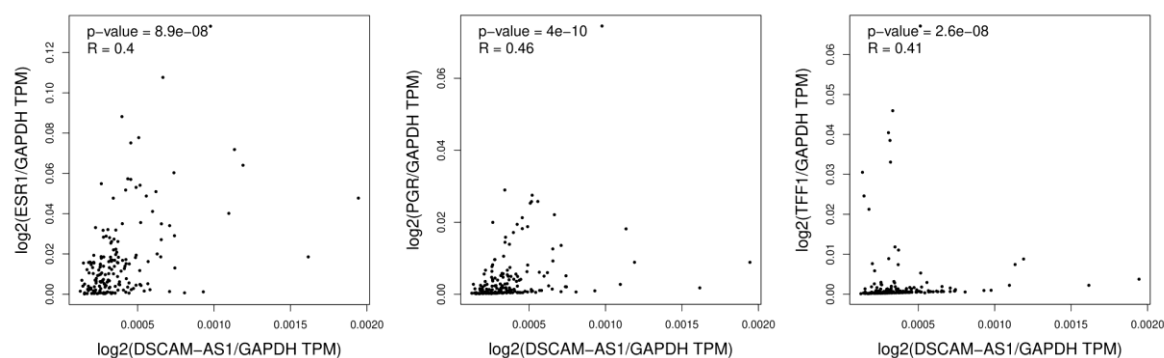

**Figure S1:** Genes of the estrogen pathway associated with DSCAM-AS1 expression in EC.

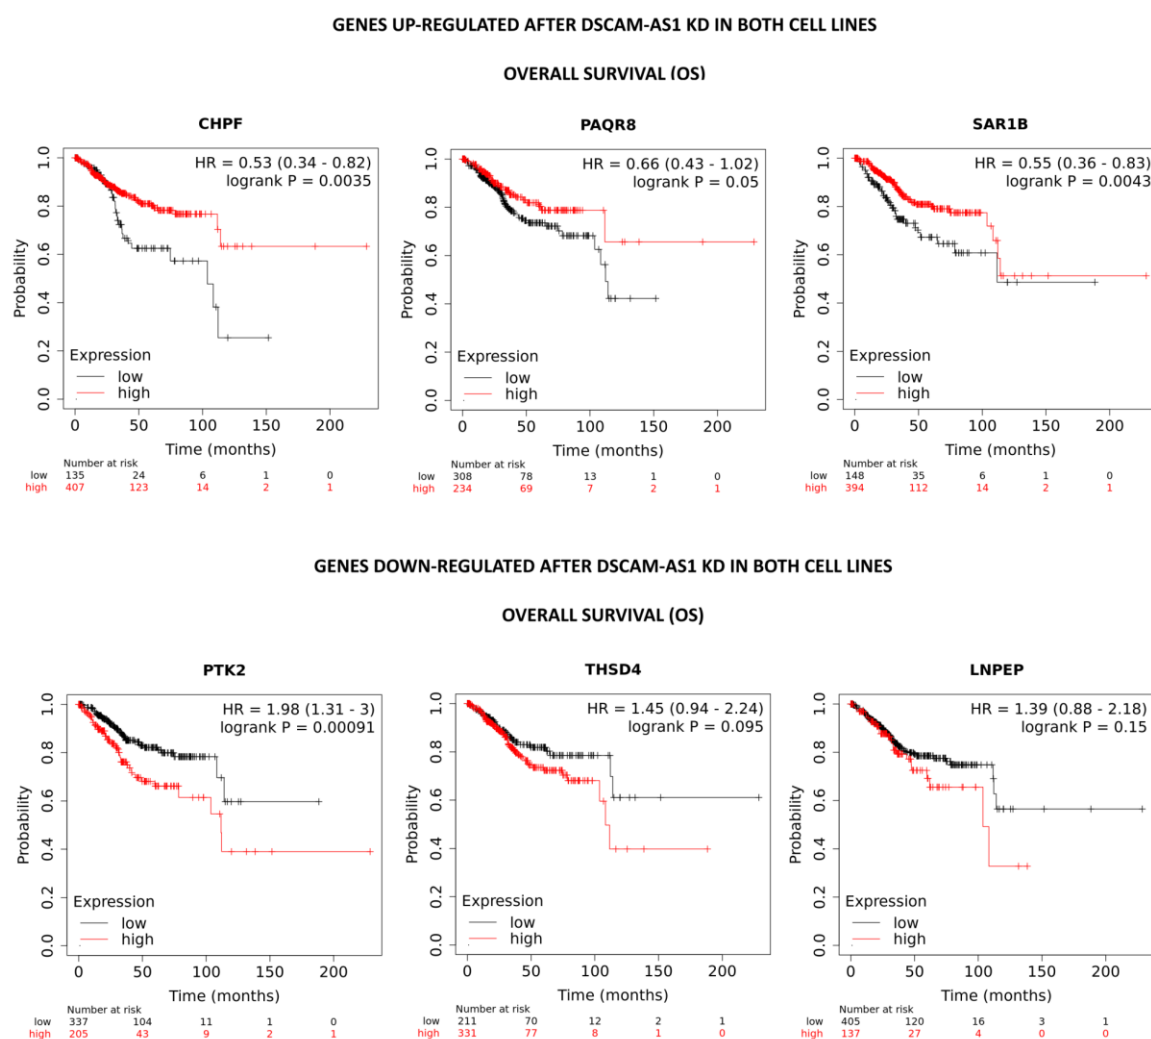

**Figure S2:** Genes with equidirectional regulation after DSCAM knockdown in HEC-1B and RL95-2 cells, indicated is their association with OS.

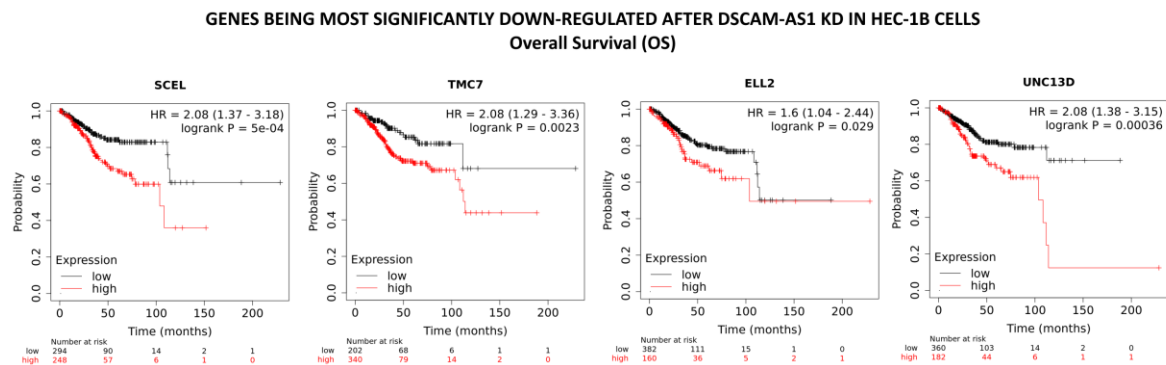

**Figure S3:** Genes being most significantly downregulated after DSCAM-AS1 knockdown in HEC-1B cells, shown is their association with OS.

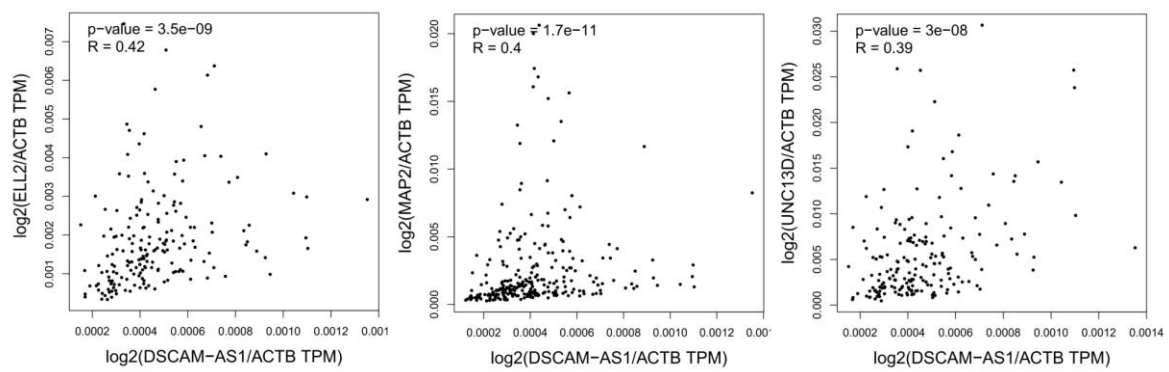

**Figure S4:** Genes being strongly downregulated after DSCAM-AS1 knockdown in EC cells, shown is their correlation with DSCAM-AS1 in endometrial adenocarcinoma tissues.
