# Supplementary material for: DSCAM-AS1 Long Non-Coding RNA Exerts Oncogenic Functions in Endometrial Adenocarcinoma via Activation of a Tumor-Promoting Transcriptome Profile
Source: Biomedicines. 2022 Jul 18;10(7):1727. doi: 10.3390/biomedicines10071727 (PMC9313190; doi:10.3390/biomedicines10071727)
Supplement: Supplementary file 1 [file biomedicines-10-01727-s001.zip]

Archive with 4 entries (4 files):
- suplementary materials.pdf
- Supplemental File S1.xlsx
- Table S1.pdf
- Table S2 new.pdf
