# Supplementary material for: DSCAM-AS1 Long Non-Coding RNA Exerts Oncogenic Functions in Endometrial Adenocarcinoma via Activation of a Tumor-Promoting Transcriptome Profile
Source: Biomedicines. 2022 Jul 18;10(7):1727. doi: 10.3390/biomedicines10071727 (PMC9313190; doi:10.3390/biomedicines10071727)
Supplement: Supplementary file 1 [file biomedicines-10-01727-s001.zip › Supplemental File S1.xlsx]

## Sheet: Tabelle1
Genes correlated with DSCAM-AS1 (R-value cut off 0.4) in the 137 sample subset" endometrioid endometrial adenocarcinoma" of open source dataset "Tumor Endometrium - EXPO - 209 - MAS5.0 - u133p2", GEO ID: GSE2109
probeset	hugo	r-value	r-pvalue	sublist
1562821_a_at	DSCAM-AS1	1	0	positive correlation
244495_x_at	TMEM241	0.720817	2.11081e-19	positive correlation
1563316_at	NEGR1-IT1	0.717075	2.99993e-19	positive correlation
220232_at	SCD5	0.706021	1.96302e-18	positive correlation
207687_at	INHBC	0.695346	1.15895e-17	positive correlation
38447_at	ADRBK1	0.692681	1.56913e-17	positive correlation
220725_x_at	DNAH3	0.692373	1.4221e-17	positive correlation
231448_at	ADAD1	0.679147	1.27963e-16	positive correlation
396_f_at	EPOR	0.67892	1.18259e-16	positive correlation
207608_x_at	CYP1A2	0.677301	1.40378e-16	positive correlation
224159_x_at	TRIM4	0.676802	1.38925e-16	positive correlation
225986_x_at	CPSF2	0.674711	1.8144e-16	positive correlation
238701_x_at	COLCA1	0.671216	3.00749e-16	positive correlation
1566956_at	OR7E104P	0.66944	3.74873e-16	positive correlation
1552863_a_at	CACNG6	0.669247	3.61235e-16	positive correlation
1553718_at	ZNF548	0.666472	5.341e-16	positive correlation
1562527_at	LOC441666	0.657042	2.28201e-15	positive correlation
238650_x_at	WDR89	0.655446	2.76911e-15	positive correlation
208360_s_at	ERVH-4	0.654747	2.92643e-15	positive correlation
208120_x_at	FKSG49	0.654622	2.83487e-15	positive correlation
1553066_at	TAAR9	0.652803	3.583e-15	positive correlation
207936_x_at	RFPL3	0.652773	3.4361e-15	positive correlation
235628_x_at	LINC01184	0.652482	3.43833e-15	positive correlation
233784_at	LOC101927769	0.651715	3.71031e-15	positive correlation
211565_at	SH3GL3	0.650907	4.0343e-15	positive correlation
1564362_x_at	ZNF843	0.650848	3.91422e-15	positive correlation
1558496_at	LOC100505609	0.650739	3.83325e-15	positive correlation
48612_at	N4BP1	0.648466	5.23605e-15	positive correlation
232814_x_at	APOPT1	0.647784	5.60919e-15	positive correlation
232037_at	IGDCC3	0.646354	6.73694e-15	positive correlation
1562674_at	LOC101929325	0.645771	7.12031e-15	positive correlation
224099_at	KCNH7	0.644385	8.49926e-15	positive correlation
216220_s_at	ADORA1	0.644102	8.59953e-15	positive correlation
1555181_a_at	ST3GAL3	0.64346	9.1893e-15	positive correlation
207365_x_at	USP34	0.642176	1.08147e-14	positive correlation
1556835_s_at	DSG2-AS1	0.639732	1.51101e-14	positive correlation
239395_at	ARRDC3-AS1	0.639249	1.57877e-14	positive correlation
240456_at	LOC101928419	0.638721	1.66169e-14	positive correlation
239718_at	LOC654342	0.638602	1.64761e-14	positive correlation
240807_at	LINC01187	0.637274	1.95203e-14	positive correlation
210195_s_at	PSG1	0.636847	2.02705e-14	positive correlation
1562861_at	LINC01231	0.636515	2.07709e-14	positive correlation
1562925_at	LOC101927648	0.636365	2.07377e-14	positive correlation
1562719_at	LOC101928476	0.635544	2.28404e-14	positive correlation
215228_at	NHLH2	0.63422	2.70662e-14	positive correlation
49327_at	SIRT3	0.633158	3.08682e-14	positive correlation
1560131_at	LOC100506497	0.632306	3.41521e-14	positive correlation
1561360_at	LOC101928661	0.632296	3.34891e-14	positive correlation
207712_at	BAGE	0.631211	3.83331e-14	positive correlation
219071_x_at	HGH1	0.627569	6.3064e-14	positive correlation
234219_at	LOC101928820	0.626671	7.01744e-14	positive correlation
1560275_at	TMEM44	0.626453	7.0972e-14	positive correlation
208037_s_at	MADCAM1	0.624414	9.26747e-14	positive correlation
206323_x_at	OPHN1	0.623967	9.68203e-14	positive correlation
241945_at	LOC101929681	0.623739	9.81253e-14	positive correlation
224425_x_at	ACTR3BP2	0.621925	1.23989e-13	positive correlation
244227_at	SYT6	0.621675	1.26108e-13	positive correlation
1560833_at	LINC01189	0.620261	1.50638e-13	positive correlation
1554591_at	PCAT4	0.619515	1.64086e-13	positive correlation
1554516_at	LINC00537	0.619288	1.66449e-13	positive correlation
1561411_at	LINC01222	0.619176	1.66254e-13	positive correlation
1554367_at	CALHM1	0.617317	2.10877e-13	positive correlation
241124_at	LOC101928702	0.614959	2.85776e-13	positive correlation
1553594_a_at	INSL3	0.614801	2.87353e-13	positive correlation
1562949_at	LINC00358	0.614635	2.89363e-13	positive correlation
205096_at	POM121	0.613673	3.2439e-13	positive correlation
51774_s_at	UBE2D4	0.610345	4.98586e-13	positive correlation
208261_x_at	IFNA10	0.608734	6.08167e-13	positive correlation
213835_x_at	GTPBP3	0.607629	6.93341e-13	positive correlation
1553849_at	CCDC26	0.606561	7.86457e-13	positive correlation
1561271_at	CCDC144CP	0.606397	7.92221e-13	positive correlation
220150_s_at	FAM184A	0.605426	8.86991e-13	positive correlation
1552643_at	ZNF626	0.604746	9.56087e-13	positive correlation
233992_x_at	ZNF445	0.60399	1.04066e-12	positive correlation
1560001_at	LOC100131581	0.60389	1.04013e-12	positive correlation
208259_x_at	IFNA7	0.603644	1.05981e-12	positive correlation
233511_at	DKFZP434L192	0.603209	1.10679e-12	positive correlation
1562103_at	LINC01359	0.600675	1.51513e-12	positive correlation
1564209_at	LINC00700	0.600532	1.52369e-12	positive correlation
220082_at	PPP1R14D	0.600143	1.58169e-12	positive correlation
1566917_at	HPYR1	0.598711	1.87626e-12	positive correlation
40446_at	PHF1	0.598594	1.88108e-12	positive correlation
215019_x_at	ZNF528	0.597459	2.14729e-12	positive correlation
240435_at	LOC101928635	0.597257	2.17704e-12	positive correlation
1559471_s_at	D21S2088E	0.596805	2.27814e-12	positive correlation
1569782_at	LOC101929116	0.59646	2.35244e-12	positive correlation
221627_at	TRIM10	0.596367	2.35283e-12	positive correlation
1559406_at	ANKRD18A	0.594103	3.09432e-12	positive correlation
220944_at	PGLYRP4	0.592466	3.75564e-12	positive correlation
1552943_at	GABRG1	0.592268	3.80709e-12	positive correlation
205669_at	NCAM2	0.591226	4.287e-12	positive correlation
1561221_x_at	LOC728099	0.590701	4.52588e-12	positive correlation
220205_at	TPTE	0.590146	4.79631e-12	positive correlation
232680_at	HDGFL1	0.588944	5.50553e-12	positive correlation
1552889_a_at	EXOC3L2	0.588757	5.57436e-12	positive correlation
241951_at	SLCO1C1	0.58839	5.77186e-12	positive correlation
1556464_a_at	C2ORF72	0.586796	6.94703e-12	positive correlation
236954_at	BOLL	0.58677	6.898e-12	positive correlation
243912_x_at	APOBEC3F	0.586368	7.17273e-12	positive correlation
211697_x_at	PNO1	0.586274	7.18366e-12	positive correlation
1557875_at	CASC17	0.586177	7.19685e-12	positive correlation
1556206_at	LINC00408	0.585553	7.69055e-12	positive correlation
207041_at	MASP2	0.583225	1.01038e-11	positive correlation
207575_at	GOLGA6A	0.582143	1.14044e-11	positive correlation
36907_at	MVK	0.582104	1.13477e-11	positive correlation
1561518_at	LINC01566	0.581551	1.20157e-11	positive correlation
234949_at	FRG1BP	0.580973	1.27596e-11	positive correlation
1557192_at	COX10-AS1	0.580902	1.27497e-11	positive correlation
1562792_at	LOC101927157	0.580046	1.39964e-11	positive correlation
215421_at	LOC100131510	0.579129	1.54754e-11	positive correlation
216877_at	LOC100505498	0.577639	1.831e-11	positive correlation
220957_at	CTAGE1	0.576289	2.12933e-11	positive correlation
1562244_at	ZNF578	0.575338	2.36095e-11	positive correlation
220717_at	ADAMTS20	0.574907	2.46216e-11	positive correlation
1553805_at	C3ORF49	0.574575	2.53771e-11	positive correlation
224135_at	WDR87	0.574174	2.6371e-11	positive correlation
221681_s_at	DSPP	0.573197	2.93175e-11	positive correlation
205998_x_at	CYP3A4	0.573087	2.94441e-11	positive correlation
231825_x_at	ATF7IP	0.572805	3.01747e-11	positive correlation
217269_s_at	TMPRSS15	0.57279	2.99743e-11	positive correlation
1554091_a_at	TIRAP	0.572641	3.02481e-11	positive correlation
1558504_at	GTF2IP12	0.572593	3.01681e-11	positive correlation
1561442_at	LOC283585	0.572263	3.10978e-11	positive correlation
1564785_at	LINC01599	0.571234	3.4769e-11	positive correlation
1564658_at	NAT16	0.570614	3.70651e-11	positive correlation
241827_at	ZNF615	0.570416	3.76253e-11	positive correlation
211481_at	SLCO1A2	0.570344	3.76402e-11	positive correlation
1552942_at	LOC149373	0.569393	4.16882e-11	positive correlation
1562950_at	LOC101927210	0.569369	4.14764e-11	positive correlation
1563391_at	LOC101927553	0.568844	4.37274e-11	positive correlation
1557605_a_at	LOC401312	0.567595	5.0098e-11	positive correlation
1562214_at	LINC01107	0.566838	5.422e-11	positive correlation
208137_x_at	ZNF611	0.56666	5.49188e-11	positive correlation
1556222_at	SEPT7P9	0.566296	5.68287e-11	positive correlation
243261_at	LINC00689	0.565582	6.11903e-11	positive correlation
1557590_at	PARD6G-AS1	0.564671	6.7379e-11	positive correlation
233311_at	LOC145845	0.564618	6.72859e-11	positive correlation
1558903_at	LINC00907	0.564484	6.7826e-11	positive correlation
237917_at	NBPF8	0.56437	6.82154e-11	positive correlation
65635_at	ENGASE	0.563301	7.64477e-11	positive correlation
205851_at	NME6	0.562883	7.958e-11	positive correlation
31861_at	IGHMBP2	0.562517	8.23462e-11	positive correlation
240204_at	SNRPN	0.562234	8.44226e-11	positive correlation
233175_at	ZNF460	0.560447	1.0248e-10	positive correlation
1557633_at	POM121L8P	0.560087	1.05957e-10	positive correlation
221464_at	OR1D2	0.558485	1.25827e-10	positive correlation
241432_at	SLIT2-IT1	0.557521	1.39097e-10	positive correlation
36888_at	HAUS5	0.557316	1.4133e-10	positive correlation
1569683_at	XYLB	0.556967	1.45929e-10	positive correlation
207780_at	CYLC2	0.556455	1.53403e-10	positive correlation
207478_at	PRO2958	0.555446	1.70336e-10	positive correlation
241715_x_at	ACPT	0.555251	1.72874e-10	positive correlation
1561303_at	LINC01568	0.555184	1.73017e-10	positive correlation
1558725_at	SRRM3	0.554878	1.77779e-10	positive correlation
220771_at	LINC00328	0.554849	1.77205e-10	positive correlation
207389_at	GP1BA	0.554687	1.79223e-10	positive correlation
211807_x_at	PCDHGB5	0.554494	1.81911e-10	positive correlation
210686_x_at	SLC25A16	0.554398	1.82669e-10	positive correlation
239975_at	HLA-DPB2	0.553135	2.08466e-10	positive correlation
205238_at	TRMT2B	0.55247	2.22747e-10	positive correlation
240114_s_at	TMEM174	0.552177	2.28566e-10	positive correlation
239687_at	SLX4	0.551889	2.34374e-10	positive correlation
1553153_at	ATP6V0D2	0.551668	2.38621e-10	positive correlation
220760_x_at	ZNF665	0.551446	2.42949e-10	positive correlation
233234_at	KCTD16	0.551395	2.42837e-10	positive correlation
1564323_at	LOC101928405	0.551094	2.49398e-10	positive correlation
232066_x_at	CTBP1-AS2	0.55103	2.49622e-10	positive correlation
1553453_at	ASB14	0.550763	2.55421e-10	positive correlation
231756_at	ZP4	0.550233	2.68924e-10	positive correlation
242822_at	LOC102723847	0.549634	2.85252e-10	positive correlation
207964_x_at	IFNA4	0.549605	2.84455e-10	positive correlation
1564203_at	LOC147004	0.547613	3.5049e-10	positive correlation
1553845_x_at	C10ORF67	0.546771	3.81376e-10	positive correlation
1562664_at	LOC102724434	0.546435	3.9303e-10	positive correlation
230949_at	SLC23A3	0.545807	4.17897e-10	positive correlation
208486_at	DRD5	0.545644	4.22845e-10	positive correlation
235445_at	POTEH-AS1	0.544786	4.60647e-10	positive correlation
206212_at	CPA2	0.544746	4.60026e-10	positive correlation
1561061_at	LOC729506	0.544489	4.70113e-10	positive correlation
1570207_at	FRRS1	0.544352	4.74343e-10	positive correlation
220352_x_at	FLJ42627	0.544111	4.83963e-10	positive correlation
1563674_at	FCRL2	0.543806	4.97127e-10	positive correlation
215563_s_at	MST1L	0.543576	5.06619e-10	positive correlation
1556722_a_at	C20ORF203	0.543157	5.26709e-10	positive correlation
1553024_at	DAOA-AS1	0.542973	5.34178e-10	positive correlation
1553809_a_at	TMEM252	0.542373	5.66049e-10	positive correlation
233732_at	LOC401320	0.542346	5.64636e-10	positive correlation
1555786_s_at	LINC00520	0.541667	6.03234e-10	positive correlation
234486_at	OR51B2	0.541407	6.16715e-10	positive correlation
1564974_at	KRTAP8-1	0.541252	6.23511e-10	positive correlation
1553221_at	ZNF583	0.541192	6.24172e-10	positive correlation
1562348_at	LINC00664	0.541171	6.22314e-10	positive correlation
1558533_at	KRBA2	0.541154	6.20197e-10	positive correlation
220113_x_at	POLR1B	0.540716	6.42759e-10	positive correlation
205818_at	BRINP1	0.540519	6.52777e-10	positive correlation
223662_x_at	DDX59	0.540473	6.5263e-10	positive correlation
205752_s_at	GSTM5	0.540437	6.51789e-10	positive correlation
213209_at	TAF6L	0.539235	7.35422e-10	positive correlation
1557369_a_at	LINC00698	0.538947	7.54036e-10	positive correlation
239359_at	MARCH11	0.538844	7.58401e-10	positive correlation
1569396_at	LOC101929280	0.538596	7.74424e-10	positive correlation
210780_at	ESR2	0.538066	8.14351e-10	positive correlation
1560081_at	RAD51-AS1	0.537519	8.57732e-10	positive correlation
208035_at	GRM6	0.537366	8.67233e-10	positive correlation
237783_at	PLAC8L1	0.53704	8.92691e-10	positive correlation
220701_at	LINC00216	0.536874	9.03733e-10	positive correlation
232953_at	LINC00266-1	0.536638	9.21662e-10	positive correlation
1559765_a_at	NALT1	0.536408	9.39382e-10	positive correlation
217045_x_at	NCR2	0.535661	1.00992e-09	positive correlation
1555074_a_at	KCNH5	0.535613	1.01012e-09	positive correlation
81737_at	LOC100505915	0.534927	1.07901e-09	positive correlation
1559170_at	ANKRD20A5P	0.534915	1.07524e-09	positive correlation
632_at	GSK3A	0.534132	1.16e-09	positive correlation
228212_at	ISM2	0.533825	1.19154e-09	positive correlation
220796_x_at	SLC35E1	0.533442	1.2335e-09	positive correlation
205367_at	SH2B2	0.533297	1.24618e-09	positive correlation
1561179_s_at	AMZ1	0.533233	1.24857e-09	positive correlation
206586_at	CNR2	0.533226	1.24377e-09	positive correlation
1561332_at	ATP13A5	0.533221	1.23872e-09	positive correlation
1562850_at	LOC101928283	0.532916	1.27224e-09	positive correlation
241644_at	BOLA2	0.532548	1.31507e-09	positive correlation
234403_at	OR1I1	0.531959	1.38402e-09	positive correlation
220828_s_at	LOC55338	0.530682	1.56906e-09	positive correlation
239259_at	ZNF557	0.530627	1.57084e-09	positive correlation
220436_at	CNTNAP3P2	0.530536	1.57845e-09	positive correlation
1563849_at	SH2D4B	0.53	1.65937e-09	positive correlation
1558995_at	ZNF547	0.52961	1.71863e-09	positive correlation
211387_x_at	RNGTT	0.52959	1.71456e-09	positive correlation
207407_x_at	CYP4A11	0.529474	1.72734e-09	positive correlation
1562634_at	LOC101927869	0.52912	1.78255e-09	positive correlation
215681_at	KIAA1654	0.528815	1.83032e-09	positive correlation
1553417_at	C11ORF44	0.528618	1.85918e-09	positive correlation
1554642_at	RNF32	0.528052	1.95991e-09	positive correlation
238213_at	MIR5188	0.527686	2.02478e-09	positive correlation
206240_s_at	ZNF136	0.527674	2.01855e-09	positive correlation
206180_x_at	ZNF747	0.527352	2.07613e-09	positive correlation
1562681_at	KRTAP5-AS1	0.527113	2.11776e-09	positive correlation
234611_at	LGALS8-AS1	0.527107	2.11024e-09	positive correlation
239031_at	SSTR2	0.526289	2.27157e-09	positive correlation
235327_x_at	UBXN2A	0.526003	2.32785e-09	positive correlation
1559227_s_at	VHL	0.525984	2.32278e-09	positive correlation
1562827_at	DIO2-AS1	0.525866	2.34067e-09	positive correlation
235702_at	ZNF225	0.524961	2.55147e-09	positive correlation
1552520_at	TMEM74	0.524745	2.59652e-09	positive correlation
204889_s_at	NEURL1	0.524669	2.60546e-09	positive correlation
1553205_at	C20ORF166-AS1	0.523996	2.77479e-09	positive correlation
215143_at	DPY19L2P2	0.523861	2.80096e-09	positive correlation
236029_at	FAT3	0.523778	2.81298e-09	positive correlation
1570315_at	HCCAT5	0.523185	2.97127e-09	positive correlation
205917_at	ZNF264	0.523005	3.01286e-09	positive correlation
1558790_s_at	ZNF252P-AS1	0.522779	3.06902e-09	positive correlation
1555823_at	PACS2	0.522431	3.16385e-09	positive correlation
1569816_at	LOC101928748	0.522068	3.26656e-09	positive correlation
1563103_at	PLCE1-AS2	0.521813	3.33673e-09	positive correlation
210395_x_at	MYL4	0.521527	3.41884e-09	positive correlation
1560070_at	LOC101928191	0.521323	3.47462e-09	positive correlation
242687_at	FAM160A1	0.521194	3.50577e-09	positive correlation
207133_x_at	ALPK1	0.520934	3.58271e-09	positive correlation
232822_x_at	LINC00629	0.51964	4.02168e-09	positive correlation
1561225_at	ANKRD30BP3	0.519481	4.06909e-09	positive correlation
239284_at	LL0XNC01-250H12.3	0.519427	4.07546e-09	positive correlation
207598_x_at	XRCC2	0.519254	4.12937e-09	positive correlation
236071_at	C9ORF135-AS1	0.519162	4.15131e-09	positive correlation
223581_at	ZNF577	0.518965	4.21618e-09	positive correlation
211753_s_at	RLN1	0.51856	4.37024e-09	positive correlation
1553633_s_at	SLC9B1	0.518514	4.37338e-09	positive correlation
215467_x_at	LOC647070	0.518184	4.50005e-09	positive correlation
215463_at	OR7E24	0.518154	4.49681e-09	positive correlation
206590_x_at	DRD2	0.518087	4.50975e-09	positive correlation
1552557_a_at	ZDHHC15	0.518085	4.49389e-09	positive correlation
1556876_s_at	TPTE2P2	0.517762	4.62075e-09	positive correlation
1552579_a_at	ADAM21	0.517598	4.67839e-09	positive correlation
221453_at	G6PC2	0.517491	4.70995e-09	positive correlation
1556986_at	OR2H1	0.517155	4.84924e-09	positive correlation
1559441_s_at	FLJ38576	0.517	4.90492e-09	positive correlation
239242_at	SLC25A5-AS1	0.516749	5.00825e-09	positive correlation
233056_x_at	DLGAP4	0.516713	5.00768e-09	positive correlation
216582_at	POM121L2	0.516345	5.17126e-09	positive correlation
205103_at	C1ORF61	0.516242	5.2046e-09	positive correlation
1559002_at	MORF4L2-AS1	0.515294	5.68466e-09	positive correlation
233775_x_at	LOC100289333	0.515148	5.74503e-09	positive correlation
232452_at	GCSAML-AS1	0.51513	5.73497e-09	positive correlation
1553185_at	RASEF	0.515024	5.77411e-09	positive correlation
237163_x_at	LOC390705	0.514024	6.33594e-09	positive correlation
234981_x_at	CMBL	0.513628	6.55854e-09	positive correlation
232620_at	WDR93	0.513519	6.6047e-09	positive correlation
1554225_a_at	LOC101929497	0.512855	7.01478e-09	positive correlation
240878_at	SPEM1	0.512797	7.0298e-09	positive correlation
1565723_at	LOC100128281	0.512579	7.15399e-09	positive correlation
1555096_at	STPG2	0.512422	7.23763e-09	positive correlation
1553162_x_at	PROSER3	0.512093	7.44338e-09	positive correlation
206916_x_at	TAT	0.511809	7.6226e-09	positive correlation
239094_at	LOC730961	0.51177	7.62556e-09	positive correlation
1562474_at	LOC101929147	0.511136	8.07324e-09	positive correlation
1560707_at	LOC283856	0.511046	8.11612e-09	positive correlation
242608_x_at	FAM161B	0.510919	8.18729e-09	positive correlation
1560760_s_at	LINC01527	0.510872	8.19678e-09	positive correlation
1555000_at	OK/SW-CL.36	0.510579	8.40071e-09	positive correlation
1552895_a_at	ANKRD30BP2	0.51022	8.66348e-09	positive correlation
1564052_at	TREML4	0.510122	8.71611e-09	positive correlation
1569206_at	TCP11L2	0.50982	8.94047e-09	positive correlation
232256_s_at	LINC00997	0.509692	9.02017e-09	positive correlation
224140_at	NPCDR1	0.509615	9.05618e-09	positive correlation
1564639_at	LOC100291323	0.50955	9.08317e-09	positive correlation
1564069_at	HOTTIP	0.509492	9.10355e-09	positive correlation
234631_at	KRTAP4-8	0.509446	9.11354e-09	positive correlation
242249_at	FRG1EP	0.509133	9.35789e-09	positive correlation
51192_at	SSH3	0.509073	9.38131e-09	positive correlation
219741_x_at	ZNF552	0.508884	9.52006e-09	positive correlation
206257_at	CCDC9	0.50864	9.7116e-09	positive correlation
1558579_at	FLJ37786	0.508339	9.95983e-09	positive correlation
232849_at	LOC100128988	0.507071	1.11527e-08	positive correlation
224418_x_at	PMCHL1	0.507021	1.11702e-08	positive correlation
232207_at	GUSBP4	0.506827	1.13399e-08	positive correlation
235870_at	LINC01140	0.506408	1.17578e-08	positive correlation
1561691_at	LINC00326	0.505893	1.23014e-08	positive correlation
1553575_at	ND6	0.505693	1.24947e-08	positive correlation
220138_at	HAND1	0.505643	1.25152e-08	positive correlation
1562073_at	LOC101927815	0.505618	1.25057e-08	positive correlation
1568894_at	LOC101929007	0.505588	1.2503e-08	positive correlation
1556829_at	TIPARP-AS1	0.505011	1.31545e-08	positive correlation
1556582_at	PVR	0.504996	1.31329e-08	positive correlation
221171_at	CCDC30	0.504914	1.31937e-08	positive correlation
224519_at	LOC100132167	0.504544	1.36162e-08	positive correlation
1559522_at	LOC100505918	0.503845	1.44888e-08	positive correlation
224323_s_at	MRO	0.50343	1.49677e-08	positive correlation
220720_x_at	MZT2B	0.503206	1.52366e-08	positive correlation
208448_x_at	IFNA16	0.50318	1.52275e-08	positive correlation
221443_x_at	PRLH	0.5031	1.52958e-08	positive correlation
1553538_s_at	COX1	0.502842	1.56204e-08	positive correlation
231106_at	BMS1P6	0.502099	1.66827e-08	positive correlation
244307_s_at	LOC101927699	0.502013	1.67671e-08	positive correlation
1561682_at	TTLL7-IT1	0.501916	1.68691e-08	positive correlation
1552673_at	RFX6	0.501856	1.69123e-08	positive correlation
1555722_at	SCAMPER	0.501581	1.72972e-08	positive correlation
206502_s_at	INSM1	0.500796	1.85419e-08	positive correlation
216174_at	HCRP1	0.500458	1.90728e-08	positive correlation
207010_at	GABRB1	0.500195	1.9482e-08	positive correlation
215040_at	RNASEH2B	0.499017	2.15815e-08	positive correlation
231886_at	LOC100134822	0.498971	2.16108e-08	positive correlation
224328_s_at	LCE3D	0.498816	2.18577e-08	positive correlation
231473_at	LOC100506530	0.498375	2.2692e-08	positive correlation
207021_at	ZPBP	0.498345	2.2689e-08	positive correlation
1557664_at	LOC101929114	0.497731	2.39292e-08	positive correlation
216408_at	OR2B2	0.497723	2.38795e-08	positive correlation
1556136_at	MYLK4	0.497666	2.39365e-08	positive correlation
205445_at	PRL	0.497516	2.41288e-08	positive correlation
241787_at	FOXCUT	0.497042	2.51228e-08	positive correlation
231540_at	LOC100130691	0.496965	2.52289e-08	positive correlation
223781_x_at	ADH4	0.496652	2.58848e-08	positive correlation
216989_at	SPAM1	0.496633	2.58584e-08	positive correlation
228130_at	ZSCAN30	0.496429	2.62696e-08	positive correlation
1558846_at	PNLIPRP3	0.496104	2.69822e-08	positive correlation
1554105_at	TMEM185A	0.495805	2.76471e-08	positive correlation
1552279_a_at	SLC46A1	0.495686	2.78696e-08	positive correlation
1569669_at	FOXR2	0.495662	2.78528e-08	positive correlation
230208_at	HCN4	0.495567	2.80173e-08	positive correlation
223954_x_at	NECAB3	0.495367	2.8451e-08	positive correlation
210614_at	TTPA	0.495275	2.86108e-08	positive correlation
225678_at	POLR3H	0.495271	2.85446e-08	positive correlation
237771_s_at	LOC101927305	0.495254	2.85108e-08	positive correlation
244205_at	ALAS2	0.494332	3.09057e-08	positive correlation
240228_at	CSMD3	0.494073	3.15517e-08	positive correlation
232494_at	CYP8B1	0.493567	3.29345e-08	positive correlation
237365_at	ELOVL2-AS1	0.493501	3.30415e-08	positive correlation
1564816_at	C14ORF178	0.493075	3.42409e-08	positive correlation
1557450_s_at	WHAMMP2	0.492797	3.50133e-08	positive correlation
242207_at	CENPP	0.491193	4.02068e-08	positive correlation
242578_x_at	SLC22A3	0.491186	4.01264e-08	positive correlation
1553661_a_at	HUS1B	0.490754	4.15931e-08	positive correlation
1552377_s_at	TVP23C	0.490134	4.38386e-08	positive correlation
1563296_at	LINC00572	0.490093	4.38867e-08	positive correlation
222259_s_at	SPO11	0.489838	4.46581e-08	positive correlation
234762_x_at	NLN	0.489178	4.71121e-08	positive correlation
230565_at	ATP6V1G3	0.489121	4.72265e-08	positive correlation
1560514_at	LINC00636	0.489014	4.75527e-08	positive correlation
206438_x_at	TCTN2	0.488941	4.77422e-08	positive correlation
235081_x_at	TRIM65	0.488443	4.97643e-08	positive correlation
1561473_at	LOC102546226	0.488065	5.13284e-08	positive correlation
218544_s_at	RCL1	0.487404	5.42727e-08	positive correlation
1556015_a_at	MESP2	0.487181	5.52097e-08	positive correlation
214598_at	CLDN8	0.48705	5.57104e-08	positive correlation
207300_s_at	F7	0.486352	5.89447e-08	positive correlation
1569753_at	LOC101928940	0.486351	5.88012e-08	positive correlation
207593_at	ABCG4	0.486243	5.92129e-08	positive correlation
1558640_a_at	GUSBP1	0.486235	5.91057e-08	positive correlation
1561252_at	LL22NC03-63E9.3	0.485443	6.32034e-08	positive correlation
208019_at	ZNF157	0.485328	6.36859e-08	positive correlation
1569796_s_at	ATRNL1	0.485286	6.37604e-08	positive correlation
215529_x_at	DIP2A	0.484802	6.63536e-08	positive correlation
221344_at	OR12D2	0.484654	6.70519e-08	positive correlation
220962_s_at	PADI1	0.484357	6.86466e-08	positive correlation
1564878_at	LOC101927606	0.484223	6.92858e-08	positive correlation
1569077_x_at	ZNF836	0.48388	7.10404e-08	positive correlation
1570289_at	LOC646736	0.483685	7.20793e-08	positive correlation
236240_at	ABHD18	0.482751	7.78058e-08	positive correlation
227887_at	FOXN3-AS1	0.4827	7.79614e-08	positive correlation
1562116_at	LINC01494	0.482021	8.24993e-08	positive correlation
1554302_s_at	LHFPL3-AS1	0.481024	8.95065e-08	positive correlation
240950_s_at	CCDC155	0.480007	9.7479e-08	positive correlation
1566658_at	LOC100507654	0.479917	9.79988e-08	positive correlation
220112_at	ANKRD55	0.479842	9.84022e-08	positive correlation
207227_x_at	RFPL2	0.47982	9.83544e-08	positive correlation
231638_at	PRSS30P	0.479553	1.00402e-07	positive correlation
206160_at	APOBEC2	0.479308	1.02292e-07	positive correlation
1560812_at	LOC101928708	0.478827	1.06357e-07	positive correlation
1560862_at	LINC01520	0.478774	1.06593e-07	positive correlation
230566_at	MORC2-AS1	0.478466	1.09189e-07	positive correlation
1562619_at	NME9	0.478264	1.10828e-07	positive correlation
233092_s_at	LOC101060157	0.47807	1.12423e-07	positive correlation
242770_at	FRG1JP	0.477897	1.13834e-07	positive correlation
1568745_at	LOC646268	0.477861	1.13918e-07	positive correlation
1561254_at	LOC340340	0.477622	1.16001e-07	positive correlation
1564285_at	HFM1	0.477406	1.17883e-07	positive correlation
1558687_a_at	FOXN1	0.477321	1.18467e-07	positive correlation
1553567_s_at	ATP6	0.477309	1.1832e-07	positive correlation
207176_s_at	CD80	0.476931	1.21633e-07	positive correlation
206829_x_at	ZNF430	0.476843	1.21985e-07	positive correlation
220135_s_at	SLC7A9	0.47671	1.23093e-07	positive correlation
224373_s_at	ND4	0.476511	1.24631e-07	positive correlation
236761_at	LHFPL3	0.476473	1.24755e-07	positive correlation
1556414_at	LINC00515	0.476442	1.24801e-07	positive correlation
229992_at	LINC00654	0.476176	1.27367e-07	positive correlation
217016_x_at	TMEM212	0.476135	1.27531e-07	positive correlation
1552967_at	ZNF645	0.475251	1.37171e-07	positive correlation
1563483_at	LINC00869	0.475051	1.39201e-07	positive correlation
1561389_at	LOC101928205	0.474344	1.47457e-07	positive correlation
1560495_at	LOC101929741	0.474129	1.495e-07	positive correlation
1564444_at	LOC100130264	0.473716	1.54461e-07	positive correlation
216149_at	LRRC37BP1	0.473549	1.56301e-07	positive correlation
240842_at	LOC101927020	0.473381	1.58187e-07	positive correlation
205370_x_at	DBT	0.473313	1.58742e-07	positive correlation
233202_at	CNTNAP3	0.4733	1.58561e-07	positive correlation
220335_x_at	CES3	0.473286	1.58401e-07	positive correlation
208695_s_at	RPL39	0.472967	1.62361e-07	positive correlation
1553708_at	LINC00525	0.47286	1.63475e-07	positive correlation
243824_at	LINC01410	0.472851	1.63242e-07	positive correlation
204691_x_at	PLA2G6	0.47255	1.67056e-07	positive correlation
220776_at	KCNJ14	0.471629	1.79709e-07	positive correlation
207859_s_at	CHRNB3	0.471298	1.83975e-07	positive correlation
1569604_at	LINC01134	0.471294	1.83638e-07	positive correlation
1557107_at	SLC26A4-AS1	0.471218	1.84414e-07	positive correlation
235060_at	LOC100190986	0.471088	1.86024e-07	positive correlation
1563427_at	LOC101928031	0.47106	1.86066e-07	positive correlation
237088_at	LINC00244	0.470974	1.87012e-07	positive correlation
1562509_at	TMEM108-AS1	0.470683	1.9121e-07	positive correlation
232911_at	ZFP14	0.470496	1.93811e-07	positive correlation
1559208_at	ST7-OT4	0.470273	1.97031e-07	positive correlation
1557754_at	LOC401068	0.470134	1.98908e-07	positive correlation
1558819_at	LOC101929759	0.469661	2.06476e-07	positive correlation
223460_at	CAMKK1	0.468974	2.18163e-07	positive correlation
206591_at	RAG1	0.468314	2.29972e-07	positive correlation
1559005_s_at	CNTLN	0.468306	2.2964e-07	positive correlation
1564352_at	CECR3	0.468147	2.32209e-07	positive correlation
224289_s_at	VN1R10P	0.468092	2.32776e-07	positive correlation
1552347_at	CRYZL1	0.467962	2.34813e-07	positive correlation
232196_at	LCA5L	0.467678	2.39401e-07	positive correlation
1557290_at	DPY19L2P4	0.46668	2.58908e-07	positive correlation
216807_at	CFAP74	0.466375	2.64426e-07	positive correlation
1553828_at	NXPE1	0.466356	2.6429e-07	positive correlation
1552773_at	CLEC4D	0.466172	2.67767e-07	positive correlation
205482_x_at	SNX15	0.465238	2.88578e-07	positive correlation
242253_at	PPP5D1	0.464861	2.97033e-07	positive correlation
220375_s_at	C5ORF66	0.464759	2.9893e-07	positive correlation
206626_x_at	SSX1	0.464756	2.98395e-07	positive correlation
1553909_x_at	SLF2	0.46442	3.06086e-07	positive correlation
1553637_s_at	TMCO5A	0.46381	3.21132e-07	positive correlation
212284_x_at	TPT1	0.462692	3.50402e-07	positive correlation
220465_at	CEBPA-AS1	0.462626	3.51556e-07	positive correlation
213827_at	ARHGAP33	0.462289	3.60614e-07	positive correlation
231071_at	YTHDF3-AS1	0.46207	3.66367e-07	positive correlation
1553561_at	TAS2R50	0.462061	3.65906e-07	positive correlation
1567247_at	OR5H1	0.461935	3.68919e-07	positive correlation
234956_at	LOC93444	0.461763	3.73388e-07	positive correlation
1569961_at	LOC101928844	0.461241	3.87985e-07	positive correlation
1561433_at	MED15P9	0.461115	3.91198e-07	positive correlation
206088_at	LRRC37A3	0.460836	3.98545e-07	positive correlation
232158_x_at	NIPAL1	0.460782	3.99527e-07	positive correlation
1567853_at	ZNF28	0.46014	4.19994e-07	positive correlation
1556183_at	ANKRD36BP2	0.460135	4.19333e-07	positive correlation
1561090_at	LINC01538	0.45988	4.27223e-07	positive correlation
219910_at	FICD	0.459009	4.57424e-07	positive correlation
1552490_at	LACE1	0.458969	4.57985e-07	positive correlation
220961_s_at	TBRG4	0.458889	4.60068e-07	positive correlation
1564386_at	TXNDC8	0.458886	4.59273e-07	positive correlation
211916_s_at	MYO1A	0.458742	4.61911e-07	positive correlation
1553551_s_at	ND2	0.457956	4.91107e-07	positive correlation
244829_at	LINC00518	0.457909	4.92015e-07	positive correlation
229563_s_at	RPL10A	0.457821	4.94555e-07	positive correlation
1569882_at	NPHP3-AS1	0.457545	5.04641e-07	positive correlation
220215_at	ZNF669	0.457266	5.15063e-07	positive correlation
1565620_at	AGAP4	0.456413	5.49324e-07	positive correlation
239612_at	LOC100240734	0.456387	5.49395e-07	positive correlation
1554253_a_at	CERS3	0.456335	5.50652e-07	positive correlation
221294_at	GPR21	0.45605	5.62262e-07	positive correlation
1560117_at	ABHD1	0.456032	5.61998e-07	positive correlation
207990_x_at	ACRV1	0.455817	5.70615e-07	positive correlation
208274_at	OCLM	0.455429	5.86315e-07	positive correlation
234288_at	LOC101929628	0.455206	5.95716e-07	positive correlation
1554839_at	CIDECP	0.45466	6.20932e-07	positive correlation
231491_at	LINC00113	0.454541	6.24526e-07	positive correlation
1560654_at	FLJ37201	0.45433	6.33846e-07	positive correlation
222969_at	B3GALT1	0.454185	6.39988e-07	positive correlation
227430_at	ZC3H10	0.454135	6.41329e-07	positive correlation
1553923_at	SLC22A24	0.45405	6.44487e-07	positive correlation
228500_at	THAP8	0.453777	6.57339e-07	positive correlation
1554812_at	CLDN20	0.453769	6.56577e-07	positive correlation
220572_at	LOC100506282	0.453715	6.58166e-07	positive correlation
1559760_at	LOC401220	0.453524	6.66924e-07	positive correlation
1557826_at	LINC01252	0.453486	6.67732e-07	positive correlation
233934_at	MIR490	0.453326	6.74983e-07	positive correlation
207663_x_at	GAGE3	0.45285	6.98315e-07	positive correlation
230837_at	LOC100132057	0.452625	7.06923e-07	positive correlation
206826_at	PMP2	0.452323	7.22675e-07	positive correlation
220671_at	NOCT	0.452055	7.36731e-07	positive correlation
224088_at	NMUR2	0.451947	7.41673e-07	positive correlation
35685_at	RING1	0.451818	7.46538e-07	positive correlation
211516_at	IL5RA	0.451482	7.6514e-07	positive correlation
1559977_a_at	SLC25A34	0.451416	7.67742e-07	positive correlation
64440_at	IL17RC	0.451162	7.8183e-07	positive correlation
211123_at	SLC5A5	0.450966	7.92531e-07	positive correlation
207205_at	CEACAM4	0.450942	7.92609e-07	positive correlation
1570155_at	LINC01111	0.450753	8.01571e-07	positive correlation
216595_at	FAM186A	0.450449	8.19465e-07	positive correlation
211741_x_at	PSG3	0.450412	8.20356e-07	positive correlation
237745_at	TSC22D1-AS1	0.450224	8.31081e-07	positive correlation
1560517_s_at	TMEM26-AS1	0.450168	8.33258e-07	positive correlation
226786_at	RFX1	0.450139	8.33661e-07	positive correlation
242507_at	UBXN7-AS1	0.449961	8.43863e-07	positive correlation
1569786_at	LOC101929694	0.449812	8.52275e-07	positive correlation
207445_s_at	CCR9	0.449578	8.6494e-07	positive correlation
1562984_at	LOC101928937	0.449523	8.67174e-07	positive correlation
217272_s_at	SERPINB13	0.448976	9.00283e-07	positive correlation
238449_at	SMG1P5	0.448857	9.07081e-07	positive correlation
227482_at	ADCK1	0.44845	9.34716e-07	positive correlation
1564333_a_at	PSAPL1	0.448399	9.35145e-07	positive correlation
201974_s_at	CCZ1	0.44824	9.45136e-07	positive correlation
236059_at	LOC100130428	0.448216	9.45313e-07	positive correlation
231012_at	SLC35G1	0.448208	9.44224e-07	positive correlation
208384_s_at	MID2	0.448164	9.45878e-07	positive correlation
1553335_x_at	LOC285696	0.447703	9.77058e-07	positive correlation
206639_x_at	HTN1	0.447371	9.9568e-07	positive correlation
223604_at	GARNL3	0.446139	1.09354e-06	positive correlation
1561454_at	LOC101929123	0.445342	1.15899e-06	positive correlation
213614_x_at	EEF1A1	0.44509	1.17976e-06	positive correlation
222927_s_at	CPLX3	0.444837	1.20095e-06	positive correlation
206353_at	COX6A2	0.444576	1.22324e-06	positive correlation
205318_at	KIF5A	0.44452	1.22641e-06	positive correlation
242912_at	POTEM	0.444018	1.27251e-06	positive correlation
236715_x_at	UACA	0.443988	1.27331e-06	positive correlation
206551_x_at	KLHL24	0.443955	1.27229e-06	positive correlation
1555348_at	TFAP2E	0.443616	1.30363e-06	positive correlation
1557029_at	HMMR-AS1	0.443368	1.32638e-06	positive correlation
214762_at	ATP6V1G2	0.443282	1.33299e-06	positive correlation
227173_s_at	BACH2	0.443103	1.34909e-06	positive correlation
233209_at	LOC200609	0.4428	1.37846e-06	positive correlation
242195_x_at	NUMBL	0.442377	1.41903e-06	positive correlation
201492_s_at	RPL41	0.442307	1.42427e-06	positive correlation
208302_at	HMHB1	0.442016	1.45394e-06	positive correlation
209643_s_at	PLD2	0.44195	1.45884e-06	positive correlation
220115_s_at	CDH10	0.441928	1.45884e-06	positive correlation
210853_at	SCN11A	0.441366	1.52021e-06	positive correlation
241382_at	PCP4L1	0.441293	1.52376e-06	positive correlation
239602_at	BRWD1-IT2	0.44084	1.57448e-06	positive correlation
210858_x_at	ATM	0.440713	1.58458e-06	positive correlation
1555447_at	ADGRG5	0.439947	1.67396e-06	positive correlation
205233_s_at	PAFAH2	0.439616	1.71091e-06	positive correlation
48030_i_at	FAXDC2	0.439409	1.73234e-06	positive correlation
219370_at	RPRM	0.439227	1.75356e-06	positive correlation
205062_x_at	ARID4A	0.439008	1.78004e-06	positive correlation
224745_x_at	OTUD5	0.438875	1.79504e-06	positive correlation
1553296_at	ADGRG7	0.438705	1.81538e-06	positive correlation
209874_x_at	CNNM2	0.438491	1.83909e-06	positive correlation
207783_x_at	HUWE1	0.438199	1.87102e-06	positive correlation
1561085_at	LOC153910	0.438194	1.86877e-06	positive correlation
206525_at	GABRR1	0.438028	1.88934e-06	positive correlation
236283_x_at	LOC646214	0.437936	1.89938e-06	positive correlation
1552587_at	CNBD1	0.437761	1.91859e-06	positive correlation
238296_at	GLIPR1L1	0.437466	1.95858e-06	positive correlation
227622_at	PCF11	0.436881	2.03999e-06	positive correlation
244164_at	FAM223B	0.43681	2.04776e-06	positive correlation
242602_x_at	ZNF254	0.436727	2.05727e-06	positive correlation
200741_s_at	RPS27	0.436704	2.0576e-06	positive correlation
1570153_at	CCDC169	0.436671	2.05956e-06	positive correlation
243101_x_at	XKR7	0.436332	2.10927e-06	positive correlation
239738_at	DACH2	0.435962	2.1618e-06	positive correlation
1562880_at	LOC100288238	0.435869	2.17359e-06	positive correlation
205143_at	NCAN	0.435856	2.17235e-06	positive correlation
238412_at	RRN3P3	0.435303	2.25352e-06	positive correlation
223429_x_at	ISY1	0.434617	2.36802e-06	positive correlation
237339_at	LINC00993	0.434358	2.41047e-06	positive correlation
1566340_at	SNORD8	0.434152	2.44399e-06	positive correlation
1554176_a_at	C3ORF33	0.432681	2.70923e-06	positive correlation
1560257_at	LOC101928988	0.432622	2.71702e-06	positive correlation
1553471_at	SLC35G3	0.43231	2.76788e-06	positive correlation
214111_at	OPCML	0.432284	2.76889e-06	positive correlation
225306_s_at	SLC25A29	0.432125	2.79753e-06	positive correlation
236001_at	LINC00675	0.431941	2.82734e-06	positive correlation
236291_at	RDH5	0.431876	2.83229e-06	positive correlation
230108_at	ERCC6	0.43112	2.98569e-06	positive correlation
1560922_s_at	ZNF169	0.431098	2.98622e-06	positive correlation
1559336_at	LOC101928505	0.430969	3.01006e-06	positive correlation
244728_at	LOC101929715	0.430917	3.01724e-06	positive correlation
216698_x_at	OR7E12P	0.430838	3.02589e-06	positive correlation
206425_s_at	TRPC3	0.430797	3.02611e-06	positive correlation
229939_at	ENDOV	0.430609	3.06359e-06	positive correlation
218242_s_at	KMT5B	0.430136	3.16254e-06	positive correlation
237619_at	FAM217A	0.430029	3.17813e-06	positive correlation
1559618_at	LOC100129447	0.429853	3.2148e-06	positive correlation
223848_at	LOC100129198	0.429733	3.23363e-06	positive correlation
1553177_at	SH2D1B	0.429574	3.26225e-06	positive correlation
221684_s_at	NYX	0.429418	3.29487e-06	positive correlation
242158_at	PAPOLB	0.429064	3.37159e-06	positive correlation
1554202_x_at	CABP4	0.428427	3.52199e-06	positive correlation
243304_at	CASC7	0.428169	3.57355e-06	positive correlation
240191_at	ZNF543	0.428016	3.60836e-06	positive correlation
220071_x_at	HAUS2	0.427772	3.66772e-06	positive correlation
235829_at	CAHM	0.427555	3.71554e-06	positive correlation
239034_at	LINC01560	0.427194	3.80912e-06	positive correlation
233675_s_at	TPTE2P6	0.427128	3.82186e-06	positive correlation
229420_at	SNORD4A	0.426959	3.85807e-06	positive correlation
1563969_at	FLJ33360	0.426956	3.85349e-06	positive correlation
1553126_a_at	SLC39A12	0.426783	3.88571e-06	positive correlation
217473_x_at	SLC11A1	0.426769	3.88427e-06	positive correlation
242462_at	LINC00665	0.426336	3.98564e-06	positive correlation
1553658_at	LINC00896	0.426319	3.98486e-06	positive correlation
215518_at	STXBP5L	0.42581	4.12311e-06	positive correlation
200717_x_at	RPL7	0.425159	4.3159e-06	positive correlation
217471_at	LINC01482	0.424776	4.42438e-06	positive correlation
237475_x_at	CCDC152	0.424712	4.43866e-06	positive correlation
240518_at	LOC729291	0.424343	4.55219e-06	positive correlation
1552497_a_at	SLAMF6	0.424256	4.57455e-06	positive correlation
229350_x_at	PARP10	0.424233	4.57577e-06	positive correlation
220401_at	FLJ21369	0.42423	4.57017e-06	positive correlation
242969_at	ZNF780B	0.424179	4.58085e-06	positive correlation
230496_at	AMER2	0.424038	4.6211e-06	positive correlation
1570210_x_at	PPP6R2	0.423784	4.69999e-06	positive correlation
1552724_at	RHOXF1	0.423759	4.70174e-06	positive correlation
210505_at	ADH7	0.423601	4.74904e-06	positive correlation
221451_s_at	OR2W1	0.423457	4.79174e-06	positive correlation
223876_at	SPATA16	0.423176	4.88275e-06	positive correlation
214529_at	TSHB	0.423159	4.88224e-06	positive correlation
215532_x_at	ZNF492	0.422898	4.96761e-06	positive correlation
230057_at	LOC285178	0.422783	5.00193e-06	positive correlation
1553446_at	LOC100996634	0.422659	5.03986e-06	positive correlation
215622_x_at	PHF7	0.422613	5.04933e-06	positive correlation
205911_at	PTH1R	0.422571	5.05781e-06	positive correlation
232738_at	CCSER1	0.422421	5.10548e-06	positive correlation
231303_at	LINC00158	0.422386	5.11125e-06	positive correlation
206096_at	ZNF35	0.421952	5.24415e-06	positive correlation
1566480_x_at	MEIOC	0.421904	5.25506e-06	positive correlation
212052_s_at	TBC1D9B	0.421895	5.25158e-06	positive correlation
221006_s_at	SNX27	0.421802	5.27926e-06	positive correlation
1558894_a_at	CCDC67	0.421719	5.30381e-06	positive correlation
243760_at	MIPEPP3	0.421541	5.35737e-06	positive correlation
220242_x_at	ZNF701	0.421266	5.45625e-06	positive correlation
1564559_at	LOC728073	0.421178	5.47568e-06	positive correlation
231031_at	KGFLP2	0.421044	5.52103e-06	positive correlation
1562336_at	CASC2	0.420786	5.60874e-06	positive correlation
242418_at	C2ORF27A	0.420623	5.65909e-06	positive correlation
1557232_at	LOC102725017	0.420289	5.77973e-06	positive correlation
235715_at	SPRNP1	0.420144	5.83207e-06	positive correlation
1562777_at	ERV3-1	0.419871	5.9384e-06	positive correlation
220883_at	PRO2012	0.419406	6.11359e-06	positive correlation
1562742_at	LINC01362	0.419213	6.18977e-06	positive correlation
200933_x_at	RPS4X	0.418923	6.30989e-06	positive correlation
238893_at	LINC00936	0.418921	6.3025e-06	positive correlation
1556528_at	LINC00692	0.41842	6.51279e-06	positive correlation
232096_x_at	FOXP1-IT1	0.417817	6.7874e-06	positive correlation
239624_at	LOC102724689	0.417594	6.88628e-06	positive correlation
214816_x_at	FAAP24	0.417388	6.97798e-06	positive correlation
219194_at	SEMA4G	0.417027	7.13896e-06	positive correlation
231789_at	PCDHB15	0.416663	7.2959e-06	positive correlation
233527_at	LOC101929340	0.416501	7.36972e-06	positive correlation
220575_at	FAM106A	0.416283	7.46445e-06	positive correlation
228247_at	LOC283788	0.416282	7.4554e-06	positive correlation
207408_at	SLC22A14	0.416059	7.55343e-06	positive correlation
214868_at	PIWIL1	0.416049	7.54903e-06	positive correlation
222104_x_at	GTF2H3	0.415987	7.57227e-06	positive correlation
228628_at	SRGAP2C	0.415894	7.61223e-06	positive correlation
209416_s_at	FZR1	0.415144	8.00209e-06	positive correlation
230620_at	USP27X	0.415141	7.99372e-06	positive correlation
1552770_s_at	ZNF563	0.415121	7.99488e-06	positive correlation
1563770_at	ZBTB8B	0.414938	8.07756e-06	positive correlation
1568638_a_at	IDO2	0.414872	8.10444e-06	positive correlation
226842_at	FBXL20	0.414661	8.21447e-06	positive correlation
206898_at	CDH19	0.414314	8.40523e-06	positive correlation
216828_at	MLLT10P1	0.414234	8.44159e-06	positive correlation
233111_at	PTCSC1	0.414074	8.51518e-06	positive correlation
207404_s_at	HTR1E	0.413537	8.81736e-06	positive correlation
224977_at	C6ORF89	0.413409	8.87399e-06	positive correlation
1569674_at	LINC00630	0.413287	8.93818e-06	positive correlation
210939_s_at	GRM1	0.412885	9.16853e-06	positive correlation
206747_at	GPRIN2	0.41285	9.17929e-06	positive correlation
1563135_at	LOC101927616	0.412827	9.18318e-06	positive correlation
216341_s_at	GNRHR	0.412823	9.17419e-06	positive correlation
240268_at	LOC440117	0.412718	9.21843e-06	positive correlation
241602_at	ZNF582	0.41257	9.3017e-06	positive correlation
1562253_at	SLC7A11-AS1	0.412402	9.39951e-06	positive correlation
217627_at	ZNF573	0.411855	9.73822e-06	positive correlation
201429_s_at	RPL37A	0.411833	9.74115e-06	positive correlation
228568_at	MYZAP	0.411627	9.85651e-06	positive correlation
232143_at	DNM1P41	0.411613	9.85393e-06	positive correlation
240054_at	MMP25-AS1	0.411596	9.8537e-06	positive correlation
1566454_at	LOC100507494	0.411265	1.00695e-05	positive correlation
206937_at	SPTA1	0.411175	1.01197e-05	positive correlation
1558641_at	SPATA24	0.411015	1.02197e-05	positive correlation
1556235_at	CH17-408M7.1	0.410308	1.07041e-05	positive correlation
220158_at	LGALS14	0.410227	1.07513e-05	positive correlation
1558755_x_at	ZNF763	0.410104	1.08295e-05	positive correlation
234165_at	PTGDR	0.410079	1.08347e-05	positive correlation
220166_at	CNNM1	0.410077	1.08235e-05	positive correlation
215758_x_at	ZNF93	0.410054	1.08271e-05	positive correlation
237274_at	LINC01208	0.410014	1.08437e-05	positive correlation
236282_at	LOC101927420	0.409979	1.08439e-05	positive correlation
1563495_at	SLC9C2	0.409916	1.08782e-05	positive correlation
214569_at	IFNA5	0.409356	1.12777e-05	positive correlation
208217_at	GABRR2	0.40932	1.12919e-05	positive correlation
235543_at	LOC102723779	0.40927	1.1304e-05	positive correlation
1553570_x_at	COX2	0.409033	1.14753e-05	positive correlation
43934_at	GPR137	0.408835	1.16043e-05	positive correlation
214682_at	PKD1P1	0.408786	1.16296e-05	positive correlation
230025_at	GJD3	0.4086	1.17646e-05	positive correlation
208386_x_at	DMC1	0.40857	1.17752e-05	positive correlation
223485_at	HAGHL	0.408371	1.19078e-05	positive correlation
1554800_at	RAB39A	0.40835	1.19111e-05	positive correlation
232455_x_at	LOC340085	0.408155	1.20569e-05	positive correlation
1552747_a_at	PP2D1	0.408116	1.20744e-05	positive correlation
1570111_at	LINC00521	0.408084	1.20872e-05	positive correlation
235729_at	ZNF514	0.407997	1.21444e-05	positive correlation
1560493_a_at	CPXCR1	0.40789	1.22194e-05	positive correlation
240316_at	C9ORF57	0.407319	1.26604e-05	positive correlation
228579_at	KCNQ3	0.407057	1.28737e-05	positive correlation
1555206_at	LOC100287210	0.406516	1.33254e-05	positive correlation
1553395_a_at	CD200R1	0.406516	1.33103e-05	positive correlation
230981_at	CATSPER3	0.406468	1.3338e-05	positive correlation
206374_at	DUSP8	0.406374	1.33923e-05	positive correlation
215057_at	LINC00894	0.406302	1.34421e-05	positive correlation
232320_at	KIAA1614-AS1	0.405917	1.37506e-05	positive correlation
220021_at	TMC7	0.405425	1.4168e-05	positive correlation
1566720_at	RPS10P7	0.405294	1.42614e-05	positive correlation
241847_at	LOC101927021	0.405155	1.43639e-05	positive correlation
1569730_at	MROH2B	0.405138	1.43636e-05	positive correlation
203735_x_at	PPFIBP1	0.405007	1.44754e-05	positive correlation
244395_at	FLJ41455	0.404682	1.47799e-05	positive correlation
1557717_at	LINC00550	0.404542	1.49036e-05	positive correlation
242332_at	FENDRR	0.404418	1.50119e-05	positive correlation
207725_at	POU4F2	0.404233	1.51833e-05	positive correlation
228099_at	ZNF550	0.40388	1.54781e-05	positive correlation
228958_at	ZNF19	0.403423	1.5908e-05	positive correlation
221169_s_at	HRH4	0.403217	1.61122e-05	positive correlation
55705_at	R3HDM4	0.402142	1.72603e-05	positive correlation
234685_x_at	KRTAP4-9	0.401318	1.81375e-05	positive correlation
200026_at	RPL34	0.401203	1.82568e-05	positive correlation
1564157_at	LOC728283	0.401083	1.8384e-05	positive correlation
203012_x_at	RPL23A	0.400735	1.87321e-05	positive correlation
1569792_a_at	ETFBKMT	0.400673	1.87684e-05	positive correlation
211325_x_at	DSTNP2	0.400673	1.87481e-05	positive correlation
1553145_at	TAPT1-AS1	0.400472	1.8938e-05	positive correlation
206493_at	ITGA2B	0.400241	1.9211e-05	positive correlation
240479_at	HS3ST5	0.400141	1.93177e-05	positive correlation
1557312_at	LINC01465	0.400009	1.94459e-05	positive correlation
201210_at	DDX3X	-0.400034	1.94351e-05	negative correlation
211069_s_at	SUMO1	-0.400602	1.87945e-05	negative correlation
203371_s_at	NDUFB3	-0.400608	1.88079e-05	negative correlation
209091_s_at	SH3GLB1	-0.400692	1.87653e-05	negative correlation
212871_at	MAPKAPK5	-0.400809	1.86611e-05	negative correlation
212397_at	RDX	-0.400919	1.85454e-05	negative correlation
211730_s_at	POLR2L	-0.401082	1.83647e-05	negative correlation
203039_s_at	NDUFS1	-0.401416	1.80393e-05	negative correlation
205361_s_at	PFDN4	-0.401628	1.78058e-05	negative correlation
212716_s_at	EIF3K	-0.401959	1.74343e-05	negative correlation
200627_at	PTGES3	-0.402036	1.73637e-05	negative correlation
201520_s_at	GRSF1	-0.402749	1.65901e-05	negative correlation
200881_s_at	DNAJA1	-0.402887	1.64552e-05	negative correlation
226749_at	MRPS9	-0.403431	1.59181e-05	negative correlation
201400_at	PSMB3	-0.403806	1.55383e-05	negative correlation
209213_at	CBR1	-0.403911	1.54636e-05	negative correlation
222489_s_at	WRNIP1	-0.404013	1.53751e-05	negative correlation
217865_at	RNF130	-0.404186	1.52137e-05	negative correlation
212372_at	MYH10	-0.405267	1.42714e-05	negative correlation
203211_s_at	MTMR2	-0.405351	1.42225e-05	negative correlation
223978_s_at	CRLS1	-0.405455	1.41556e-05	negative correlation
217768_at	C14ORF166	-0.405715	1.39244e-05	negative correlation
219356_s_at	CHMP5	-0.405978	1.37097e-05	negative correlation
223209_s_at	VIMP	-0.406055	1.3654e-05	negative correlation
200696_s_at	GSN	-0.406461	1.33288e-05	negative correlation
200900_s_at	M6PR	-0.407033	1.28799e-05	negative correlation
208910_s_at	C1QBP	-0.407609	1.24271e-05	negative correlation
201157_s_at	NMT1	-0.407756	1.23176e-05	negative correlation
212038_s_at	VDAC1	-0.408507	1.1812e-05	negative correlation
221692_s_at	MRPL34	-0.408986	1.14989e-05	negative correlation
208736_at	ARPC3	-0.409294	1.12988e-05	negative correlation
200812_at	CCT7	-0.409589	1.11116e-05	negative correlation
219485_s_at	PSMD10	-0.409981	1.08551e-05	negative correlation
224637_at	OST4	-0.410805	1.03566e-05	negative correlation
201390_s_at	CSNK2B	-0.411782	9.76367e-06	negative correlation
223158_s_at	NEK6	-0.41235	9.42189e-06	negative correlation
201470_at	GSTO1	-0.412724	9.22571e-06	negative correlation
208652_at	PPP2CA	-0.413156	9.00883e-06	negative correlation
200634_at	PFN1	-0.413481	8.84093e-06	negative correlation
226024_at	COMMD1	-0.413543	8.8249e-06	negative correlation
205690_s_at	BUD31	-0.414152	8.4791e-06	negative correlation
202678_at	GTF2A2	-0.414972	8.06862e-06	negative correlation
1560587_s_at	PRDX5	-0.4152	7.98105e-06	negative correlation
228283_at	CMC1	-0.416237	7.46937e-06	negative correlation
209046_s_at	GABARAPL2	-0.416354	7.43684e-06	negative correlation
208968_s_at	CIAPIN1	-0.416759	7.25589e-06	negative correlation
201005_at	CD9	-0.417013	7.13681e-06	negative correlation
201726_at	ELAVL1	-0.417045	7.13922e-06	negative correlation
201011_at	RPN1	-0.418764	6.36485e-06	negative correlation
202591_s_at	SSBP1	-0.419585	6.04432e-06	negative correlation
202113_s_at	SNX2	-0.419605	6.04397e-06	negative correlation
202733_at	P4HA2	-0.420467	5.71472e-06	negative correlation
203465_at	MRPL19	-0.420692	5.63891e-06	negative correlation
233268_s_at	CHURC1	-0.420849	5.59088e-06	negative correlation
201903_at	UQCRC1	-0.421185	5.48035e-06	negative correlation
219030_at	TPRKB	-0.421592	5.34482e-06	negative correlation
202146_at	IFRD1	-0.421999	5.23355e-06	negative correlation
217774_s_at	TRMT112	-0.422038	5.22612e-06	negative correlation
201020_at	YWHAH	-0.422068	5.22197e-06	negative correlation
208628_s_at	YBX1	-0.424974	4.36767e-06	negative correlation
215416_s_at	STOML2	-0.426317	3.97995e-06	negative correlation
202675_at	SDHB	-0.426466	3.95383e-06	negative correlation
218495_at	UXT	-0.42671	3.88992e-06	negative correlation
202416_at	DNAJC7	-0.426763	3.88048e-06	negative correlation
225040_s_at	RPE	-0.426797	3.88714e-06	negative correlation
213376_at	ZBTB1	-0.426917	3.85901e-06	negative correlation
223215_s_at	JKAMP	-0.427004	3.85104e-06	negative correlation
202078_at	COPS3	-0.427761	3.66549e-06	negative correlation
207805_s_at	PSMD9	-0.428235	3.56131e-06	negative correlation
200955_at	IMMT	-0.428361	3.53378e-06	negative correlation
203396_at	PSMA4	-0.429003	3.38172e-06	negative correlation
217923_at	PEF1	-0.429284	3.32239e-06	negative correlation
200750_s_at	RAN	-0.429728	3.23015e-06	negative correlation
218106_s_at	MRPS10	-0.429786	3.2259e-06	negative correlation
204868_at	ICT1	-0.430041	3.18015e-06	negative correlation
207845_s_at	ANAPC10	-0.430306	3.1279e-06	negative correlation
212482_at	RMND5A	-0.43082	3.02526e-06	negative correlation
208746_x_at	ATP5L	-0.430883	3.02019e-06	negative correlation
207714_s_at	SERPINH1	-0.431557	2.89536e-06	negative correlation
200833_s_at	RAP1B	-0.431879	2.83595e-06	negative correlation
202325_s_at	ATP5J	-0.432071	2.80437e-06	negative correlation
220617_s_at	ZNF532	-0.432462	2.74109e-06	negative correlation
202188_at	NUP93	-0.43259	2.71934e-06	negative correlation
224800_at	WDFY1	-0.432738	2.70202e-06	negative correlation
201931_at	ETFA	-0.433833	2.49504e-06	negative correlation
203484_at	SEC61G	-0.434106	2.4487e-06	negative correlation
200960_x_at	CLTA	-0.435735	2.18523e-06	negative correlation
200039_s_at	PSMB2	-0.435821	2.17462e-06	negative correlation
201546_at	TRIP12	-0.436163	2.13284e-06	negative correlation
200055_at	TAF10	-0.437062	2.01575e-06	negative correlation
227413_at	UBLCP1	-0.437782	1.91848e-06	negative correlation
223003_at	C19ORF43	-0.438325	1.85634e-06	negative correlation
210028_s_at	ORC3	-0.438353	1.85531e-06	negative correlation
222474_s_at	TOMM22	-0.438679	1.81604e-06	negative correlation
202108_at	PEPD	-0.439471	1.7271e-06	negative correlation
203583_at	UNC50	-0.439649	1.70951e-06	negative correlation
217827_s_at	SPG21	-0.440515	1.60609e-06	negative correlation
207483_s_at	CAND1	-0.440728	1.5854e-06	negative correlation
225194_at	PLRG1	-0.441342	1.52049e-06	negative correlation
212245_at	MCFD2	-0.442755	1.38091e-06	negative correlation
223244_s_at	NDUFA12	-0.443964	1.27349e-06	negative correlation
214737_x_at	HNRNPC	-0.445844	1.11684e-06	negative correlation
201716_at	SNX1	-0.447536	9.84738e-07	negative correlation
200925_at	COX6A1	-0.447647	9.77929e-07	negative correlation
201252_at	PSMC4	-0.447666	9.78176e-07	negative correlation
200978_at	MDH1	-0.447896	9.64162e-07	negative correlation
223060_at	C14ORF119	-0.448403	9.36464e-07	negative correlation
217933_s_at	LAP3	-0.449205	8.85902e-07	negative correlation
202483_s_at	RANBP1	-0.449242	8.84824e-07	negative correlation
208799_at	PSMB5	-0.449708	8.5769e-07	negative correlation
202567_at	SNRPD3	-0.450911	7.93141e-07	negative correlation
224330_s_at	MRPL27	-0.45183	7.47173e-07	negative correlation
217898_at	EMC7	-0.45276	7.00709e-07	negative correlation
200950_at	ARPC1A	-0.452828	6.9823e-07	negative correlation
213111_at	PIKFYVE	-0.45312	6.84836e-07	negative correlation
204616_at	UCHL3	-0.454583	6.23594e-07	negative correlation
222460_s_at	FAM192A	-0.455473	5.85356e-07	negative correlation
203517_at	MTX2	-0.456506	5.46307e-07	negative correlation
218008_at	TMEM248	-0.458786	4.61178e-07	negative correlation
203605_at	SRP54	-0.45879	4.61941e-07	negative correlation
200619_at	SF3B2	-0.460984	3.94576e-07	negative correlation
212506_at	PICALM	-0.461743	3.73228e-07	negative correlation
216515_x_at	MIR1244-3	-0.463207	3.36671e-07	negative correlation
224298_s_at	UBAC2	-0.466504	2.62158e-07	negative correlation
201317_s_at	PSMA2	-0.467238	2.47769e-07	negative correlation
209092_s_at	GLOD4	-0.467883	2.35862e-07	negative correlation
222832_s_at	MFF	-0.47157	1.80211e-07	negative correlation
205480_s_at	UGP2	-0.472421	1.68519e-07	negative correlation
201379_s_at	TPD52L2	-0.474235	1.4849e-07	negative correlation
218117_at	RBX1	-0.47658	1.24184e-07	negative correlation
200701_at	NPC2	-0.47685	1.22201e-07	negative correlation
212396_s_at	EMC1	-0.476988	1.21324e-07	negative correlation
201840_at	NEDD8	-0.48108	8.92847e-08	negative correlation
221434_s_at	SLIRP	-0.483161	7.52661e-08	negative correlation
225422_at	CDC26	-0.483886	7.11792e-08	negative correlation
223156_at	MRPS23	-0.486551	5.80657e-08	negative correlation
200820_at	PSMD8	-0.489827	4.45847e-08	negative correlation
201176_s_at	ARCN1	-0.489963	4.42821e-08	negative correlation
207508_at	ATP5G3	-0.492451	3.60212e-08	negative correlation
203832_at	SNRPF	-0.497657	2.38883e-08	negative correlation
208827_at	PSMB6	-0.499683	2.03628e-08	negative correlation
223054_at	DNAJB11	-0.503662	1.46922e-08	negative correlation
206621_s_at	EIF4H	-0.50803	1.02224e-08	negative correlation
223064_at	RNF181	-0.520445	3.73064e-09	negative correlation
202298_at	NDUFA1	-0.520668	3.66375e-09	negative correlation
223145_s_at	AKIRIN2	-0.526582	2.21509e-09	negative correlation
216194_s_at	TBCB	-0.531978	1.3876e-09	negative correlation
223416_at	SF3B6	-0.541139	6.17999e-10	negative correlation
